# Supplementary material for: Highly specific colorimetric detection based on aggregation of l-cysteine functionalized gold nanoparticles for cypermethrin in water samples
Source: Royal Society of Chemistry journal article supplement (doi:10.1039/d3ra07626a), 2024-01-01
Supplement: d3ra07626a1.pdf [file d3ra07626a1.pdf]

## Electronic Supplementary Material

### Highly specific colorimetric detection based on aggregation of L-cysteine functionalized gold nanoparticles for cypermethrin in water samples

Thitima Rujiralai,<sup>\*ab</sup> Nitchakarn Leelaharat<sup>ab</sup> and Wilairat Cheewasedtham<sup>b</sup>

<sup>a</sup>*Center of Excellence for Innovation in Chemistry and Division of Physical Science, Faculty of Science, Prince of Songkla University, Hat Yai, Songkhla, 90110, Thailand. Email: thitima.r@psu.ac.th*

<sup>b</sup>*Analytical Chemistry and Environment Research Unit, Division of Science, Faculty of Science and Technology, Prince of Songkla University, Pattani, 94000, Thailand.*

#### Experiment

##### De-aggregation process

A 200  $\mu\text{L}$  of fresh AuNPs@Cyst and 100  $\mu\text{L}$  of 1 mM phosphate buffer (pH 7) were placed in a 1-mL Eppendorf tube and mixed by vortex. Then, 200  $\mu\text{L}$  of hydrolyzed cypermethrin (HCy) were added to the tube and mixed by vortex again. The mixture solution was left for 1 min and heated at 90  $^{\circ}\text{C}$  for 10 min.<sup>1</sup> The control solution was prepared in a similar way without heating. Besides, the blank solution was prepared by replacing HCy with methanol and without heating. Finally, the color change of the resulting solutions was photographed using a mobile phone camera and FE-TEM images were recorded on a field emission transmission electron microscope (FE-TEM) (Talos F200i, Thermo Scientific, Czech Republic).

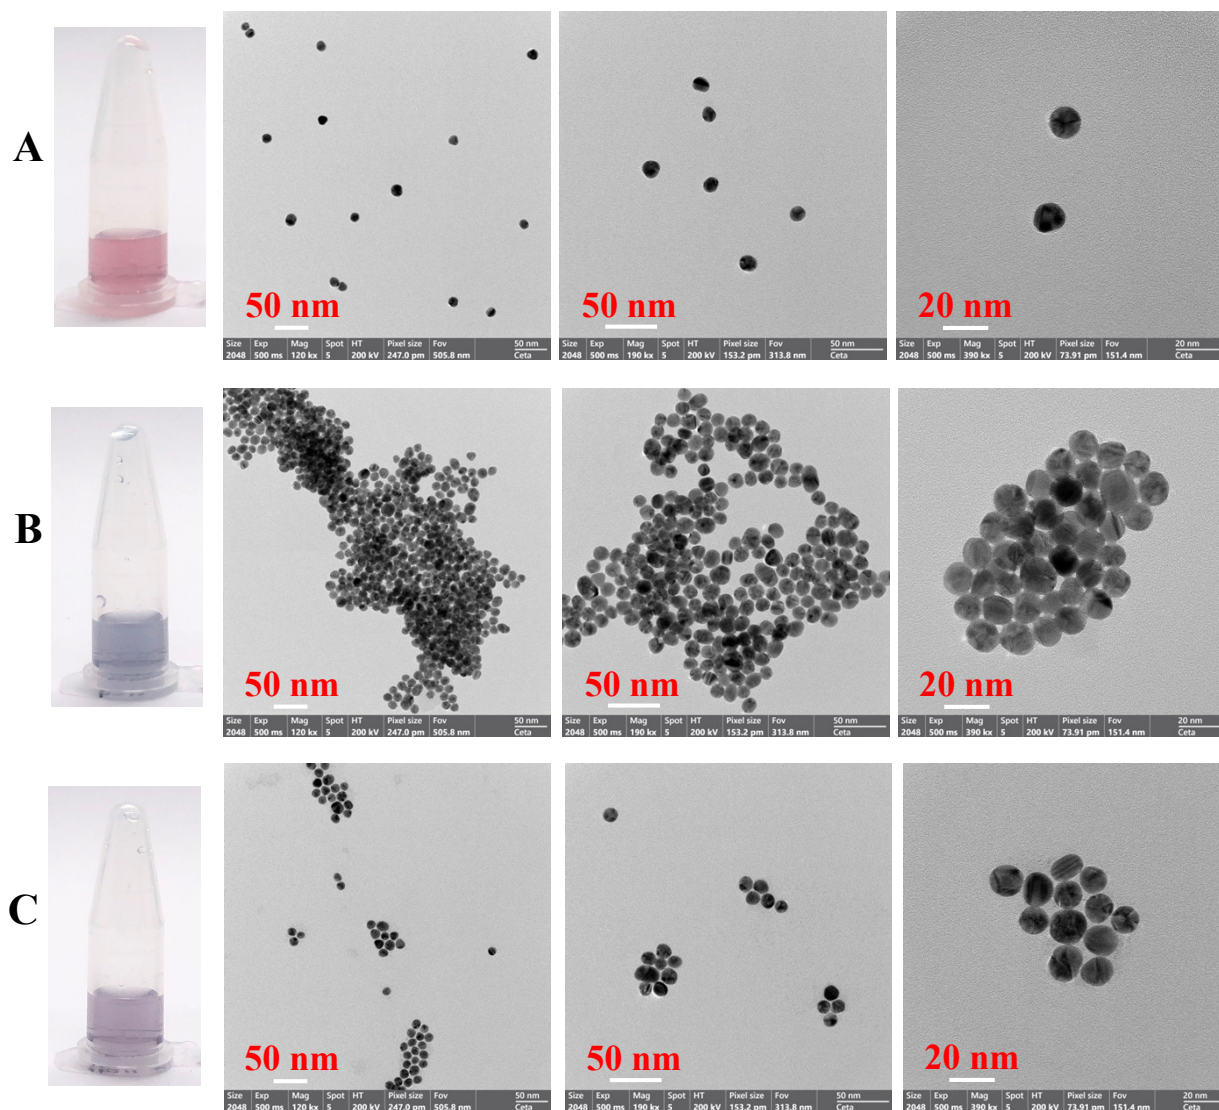

**Fig. S1** Color and FE-TEM images of (A) AuNPs@Cyst without HCY (blank solution), (B) AuNPs@Cyst with HCY (aggregation) and (C) AuNPs@Cyst with HCY after heating at 90 °C for 10 min (de-aggregation). Magnitudes of FE-TEM were 120 kx, 190 kx and 390 kx, respectively.

## Reference

- 1 S. Mandal, A. Gole, N. Lala, R. Gonnade, V. Ganvir and M. Sastry, *Langmuir*, 2001, **17**, 6262–6268.
